# Supplementary material for: Lung tumors with distinct p53 mutations respond similarly to p53 targeted therapy but exhibit genotype-specific statin sensitivity
Source: PubMed Central journal article supplement (PMC5580655; doi:10.1101/gad.298463.117), 2017-07-01
Supplement: supp_gad.298463.117_Supplemental_Material.pdf [file supp_gad.298463.117_Supplemental_Material.pdf]

A

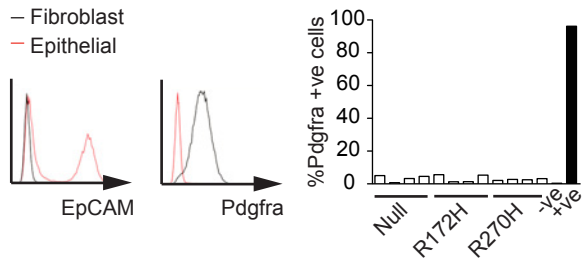

B

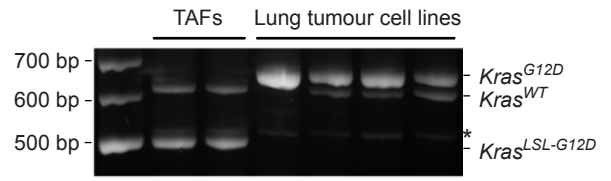

C

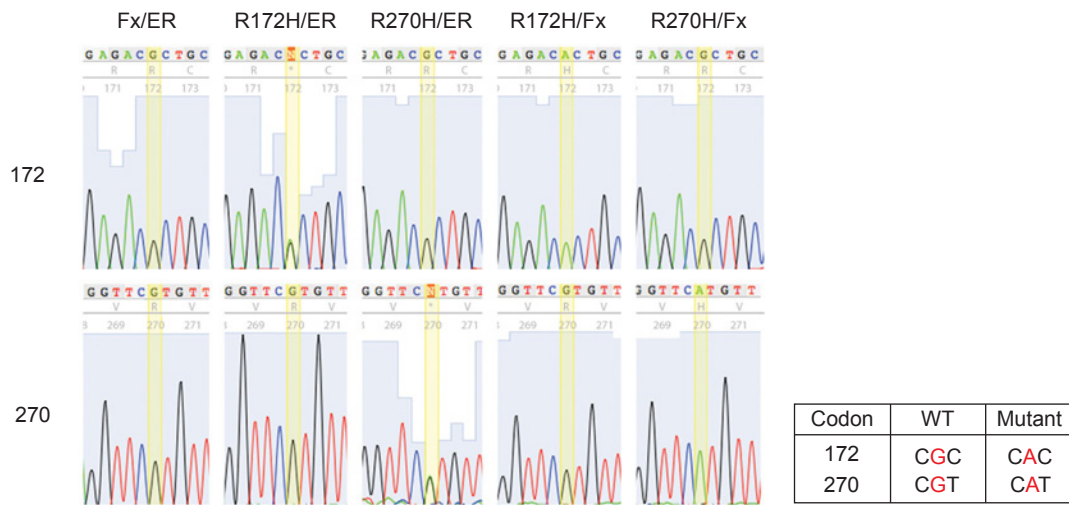

D

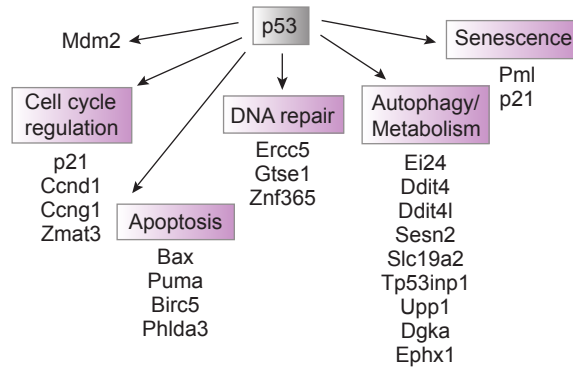

**Supplemental Figure S1. Characterization of p53 null and mutant lung tumour cell lines and analysis of restored wild-type p53 signalling.**

**A.** Left and middle, representative data showing EpCAM (epithelial marker; left) and Pdgfra (fibroblast marker; middle) expression in murine lung tumor cell lines and mouse embryonic fibroblasts (MEFs) based on FACS analysis. Right, percentage of Pdgfra-positive cells across the twelve tumor cell lines analyzed by microarray. Epithelial cells were used as a negative (-ve) and MEFs as positive (+ve) control. **B.** Genotyping of the KrasG12D allele (PCR) in lung tumor associated fibroblasts (TAFs) and tumor cell cultures derived from our murine models. Bands corresponding to the mutant unrecombined (KrasLSL-G12D), recombined (KrasG12D) or WT (KrasWT) alleles are indicated. (\*) denotes a background band. **C.** Sequencing chromatograms illustrate the different p53 genotypes of murine tumor cell lines used. **D.** Diagram showing examples of p53 targets similarly regulated in all genotypes grouped according to their distinct cellular functions.

A

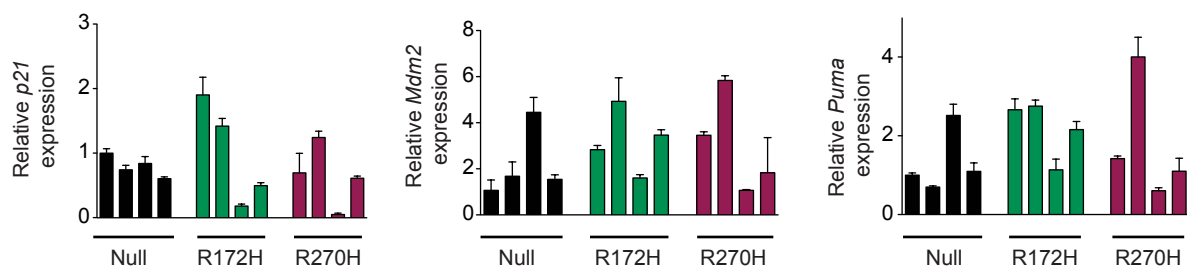

B

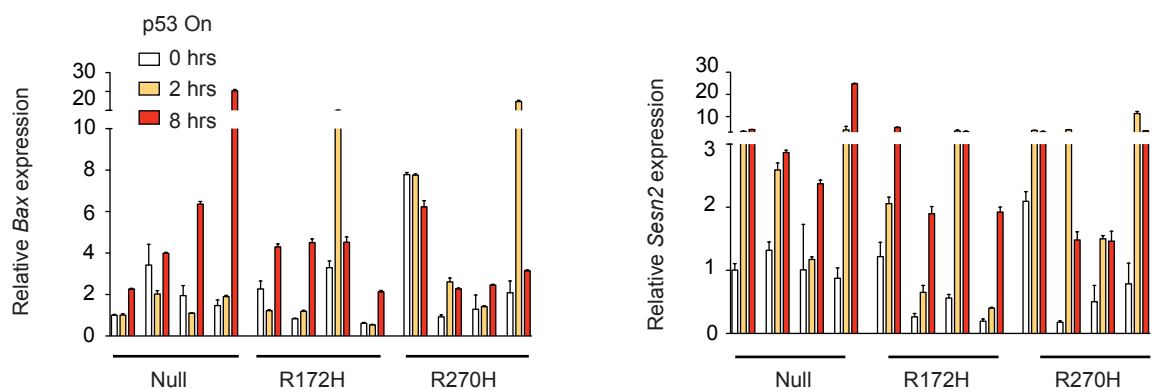

C

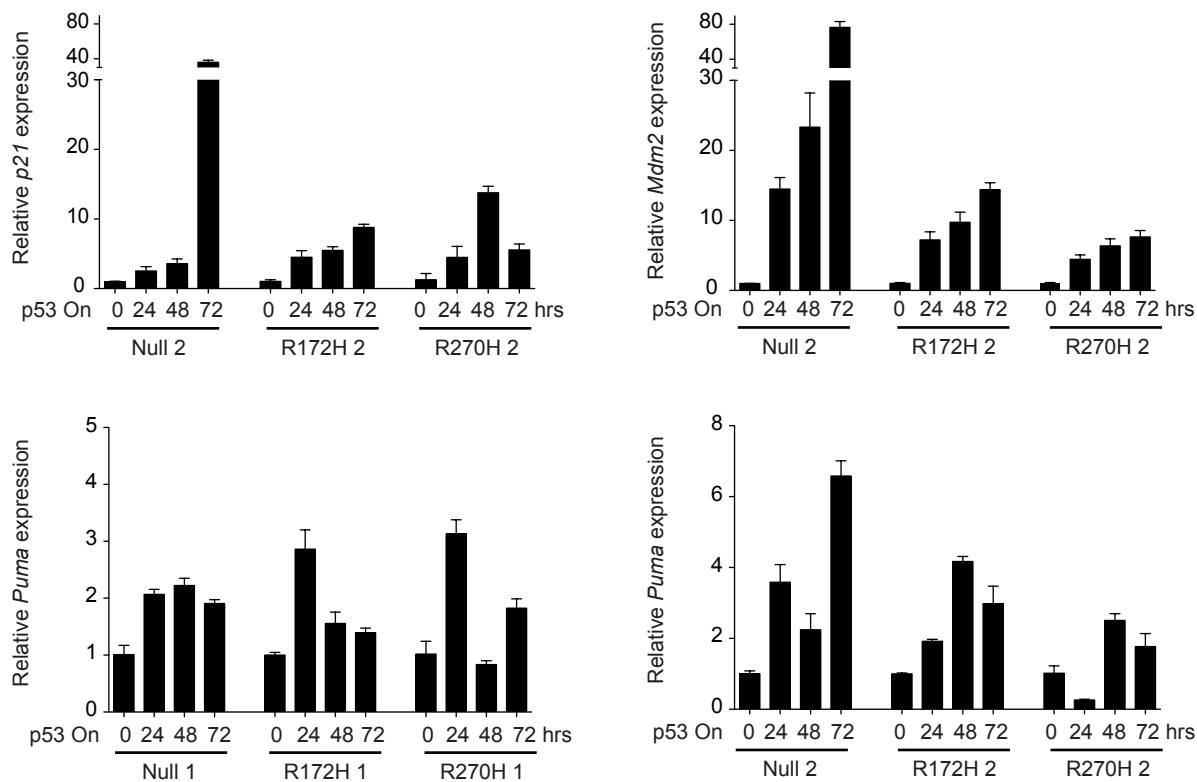

**Supplemental Figure S2. WT p53 restoration induces key p53 target genes in p53 mutant and null cells.**

Representative Taqman data (n=2 runs) show expression of genes in Null, R172H, R270H cell lines; SD of triplicate mean/cell line shown. **A.** Basal RNA expression of indicated genes in untreated cells shown relative to a Null sample (first bar). n=4 cell lines/genotype shown. **B,** **C** Expression of p53 target genes at indicated timepoints following vehicle/4OHT treatment. **B.** Expression relative to vehicle treated (p53 Off) Null cell line (first bar); n=4 cell lines/genotype. **C.** Expression shown relative to vehicle at corresponding timepoints; n=2 cell lines/genotype.

A

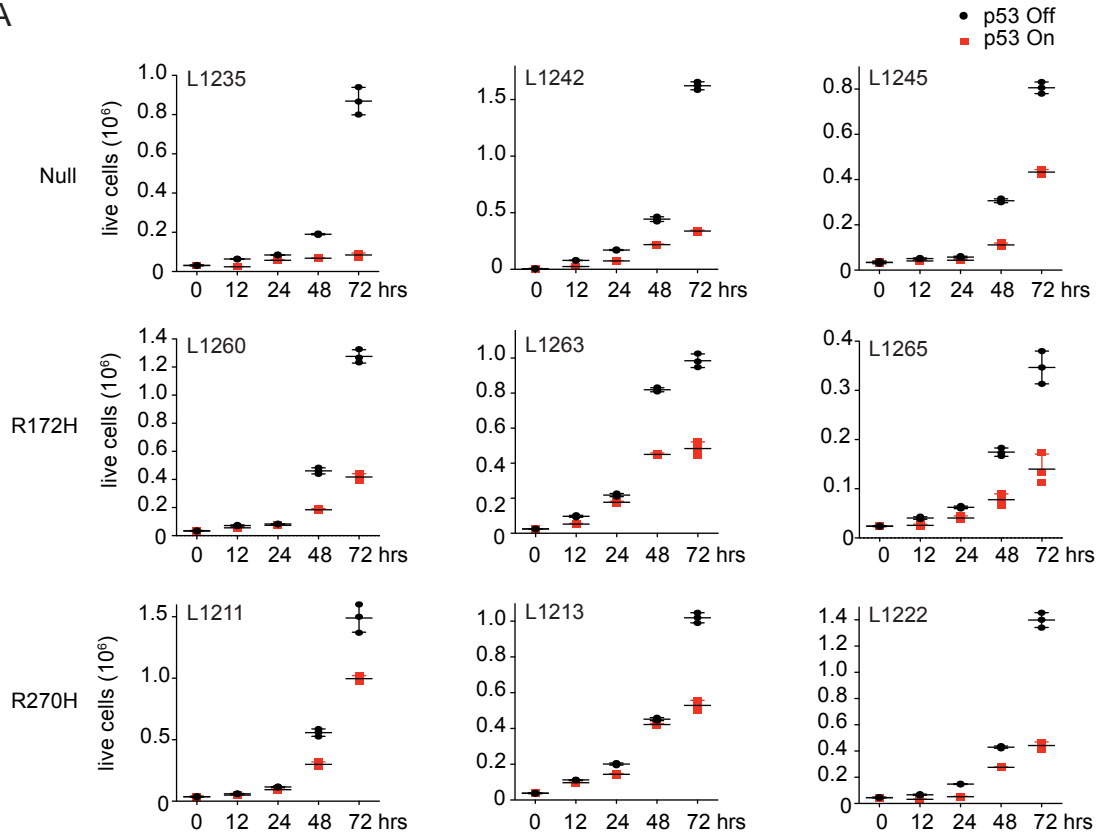

B

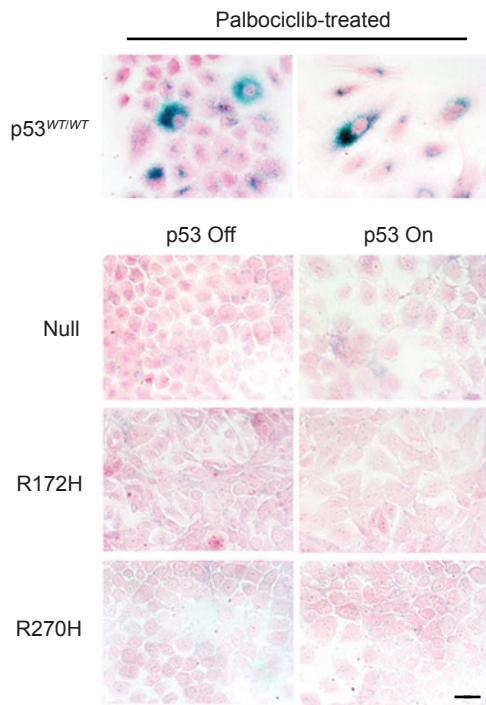

C

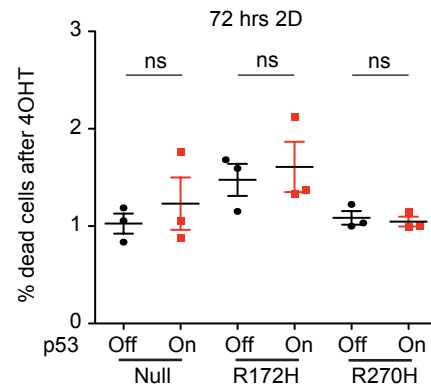

D

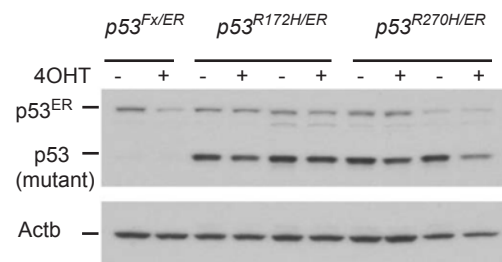

**Supplemental Figure S3. Viability of Null, R172H and R270H lung tumor cell lines following p53 restoration.**

**A.** Growth curves of p53 Null, R172H and R270H cell lines treated with vehicle (p53 Off) or 4OHT (p53 On). Three independent cell lines/genotype shown. Symbols denote technical triplicates and mean  $\pm$ SD indicated. **B.** Representative  $\beta$ -galactosidase staining in p53 null and mutant cells (one cell line/genotype shown of two analysed) 72 hrs after p53 restoration. Two palbociclib-treated wild-type p53 human lung cancer cell lines shown as a positive control. Scale bar: 40  $\mu$ m. **C.** Percentage dead cells 72 hrs after p53 restoration (2D cultures). Representative data (n=3 experiments) show one cell line/genotype  $\pm$ SD of triplicates, *t*-test ns: non-significant. **D.** Expression levels of (mutant) p53, p53ER and Actb 24 hrs after Ctrl (“-”) or 4OHT treatment (“+”), based on immunoblotting (see Figure 3H).

A

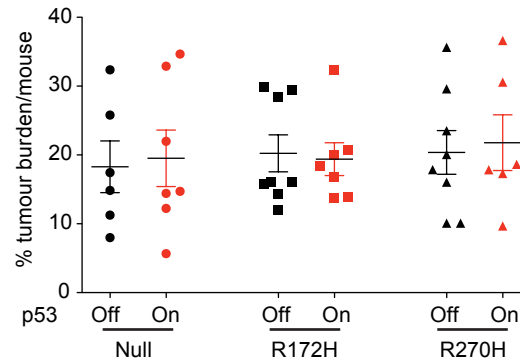

B

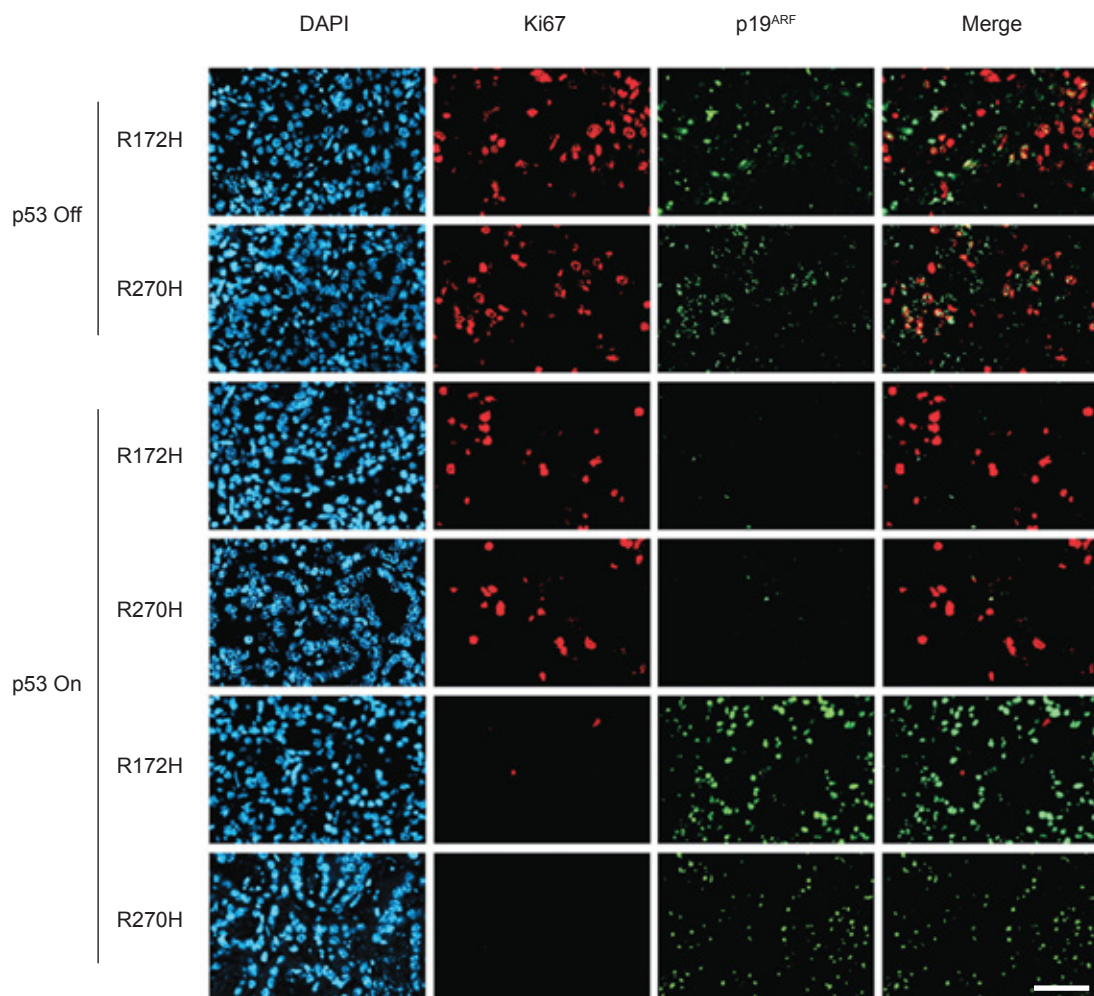

**Supplemental Figure S4. Characterization of the effects of wild-type p53 restoration in p53 mutant and p53 null tumors.**

**A.** Quantification of tumor burden/animal/genotype  $\pm$ SEM (symbols represent individual mice) in the presence (p53 On) or absence (p53 Off) of p53 restoration (6 days). **B.** Representative data illustrates p19ARF (green) and Ki67 (red) expression in lung tumor sections in the presence or absence of p53 restoration (6 days). DAPI staining shown in blue. Scale bar: 60  $\mu$ m.

A

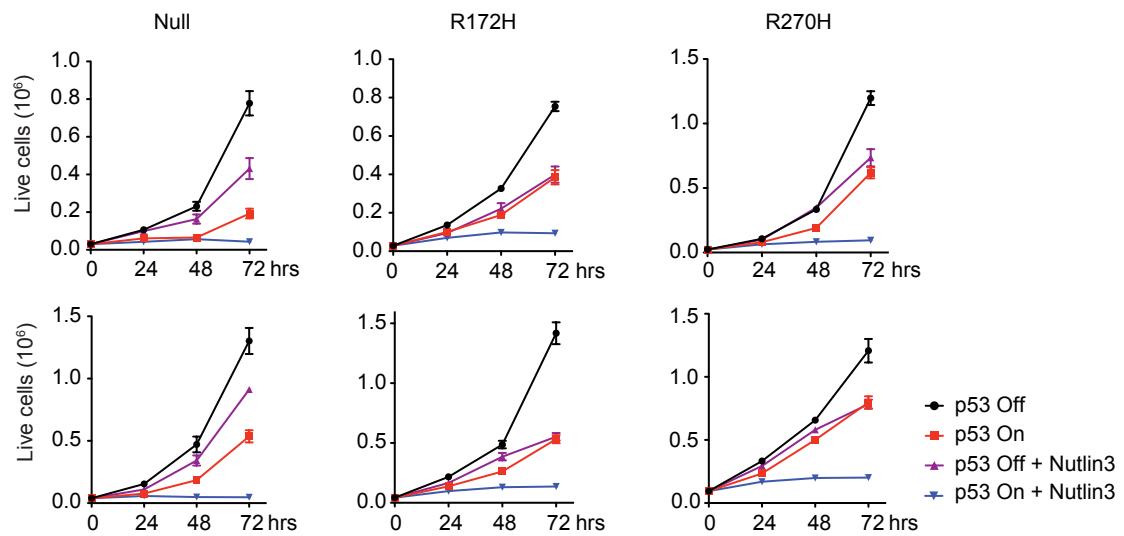

B

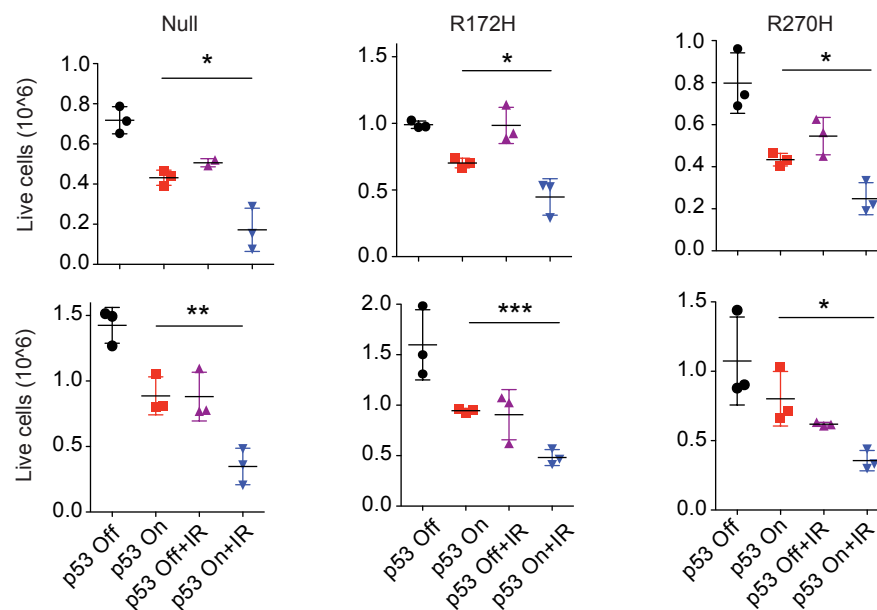

**Supplemental Figure S5. p53 activation through exogenous signals enhances its tumor suppressive effect in p53-null and mutant lung tumor cells.**

**A.** Growth curves for Null, R172H and R270H lung tumor cells treated with vehicle (p53 Off), 4OHT (p53 On), vehicle+Nutlin-3 or 4OHT+Nutlin-3. Representative data (n=3 experiments) shows two independent cell lines/genotype. Triplicate mean  $\pm$ SD shown. **B.** Cell viability 48 hrs after exposure of indicated cells to vehicle, 4OHT, ionizing radiation (IR, 4Gy) or combined treatment (p53 On+IR). Representative data (n=3 experiments) show two independent cell lines/genotype (n=4). Symbols show values of triplicates and mean  $\pm$ SD indicated, t-test; non-significant: ns, \*P<0.05, \*\*P<0.01, \*\*\*P<0.001.



A

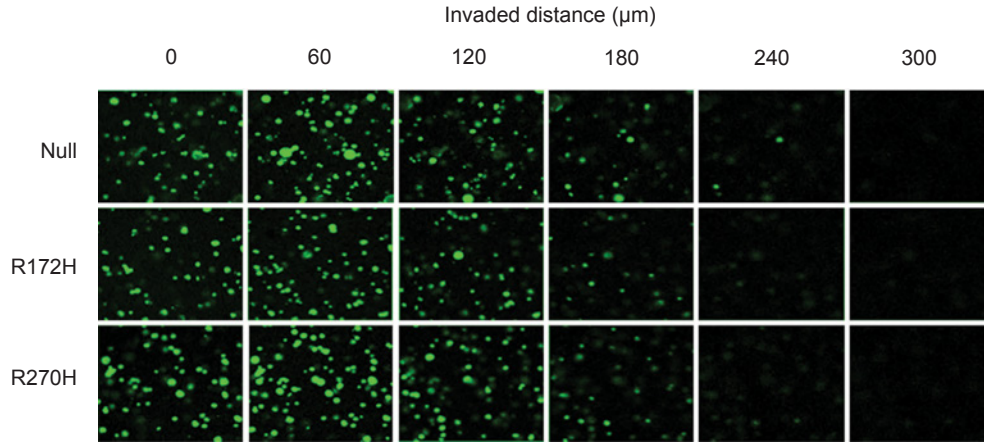

B

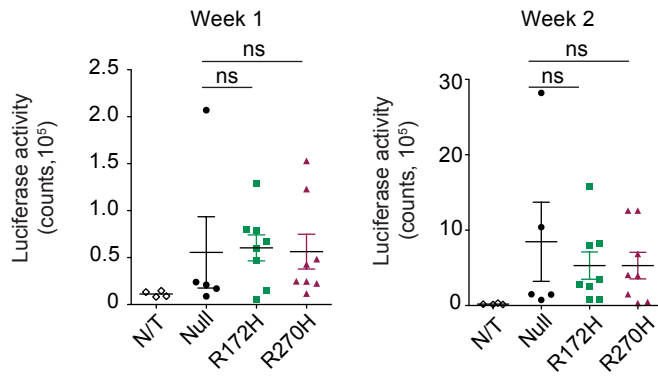

C

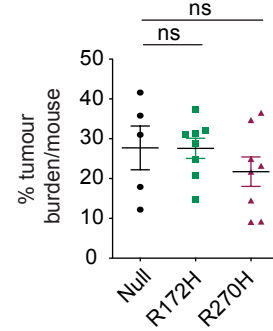

D

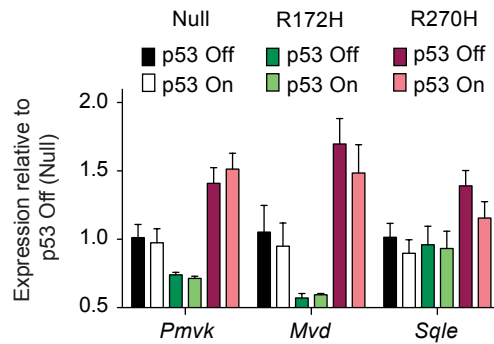

E

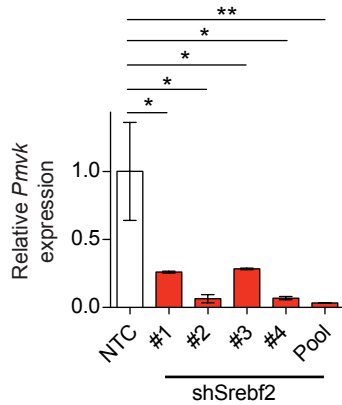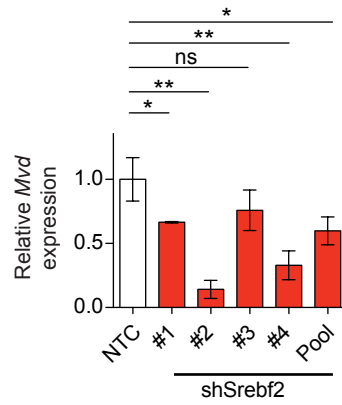

F

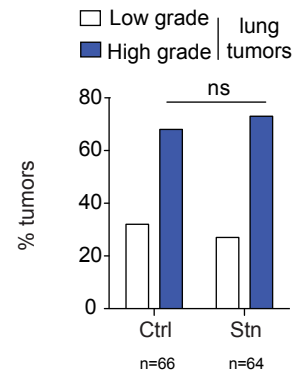

**Supplemental Figure S6. Phenotypic characterization of p53 Null, R172H and R270H lung tumor cells.**

**A.** Representative data (two cell lines examined/genotype) show invasive growth of p53-null and p53-mutant colonies through Matrigel in one cell line/genotype. Images of z-stack slices displaying invaded distance for each genotype (see Figure 5E). **B.** Luciferase activity of transplanted tumor cells of the indicated genotypes in the lungs of recipient mice one week (1) and two weeks (2) after transplantation (a minimum of 5 recipient mice transplanted/genotype). **C.** Percentage tumour burden/mouse/genotype at end point for mice shown in (B). **D.** Expression of Pmvk, Mvd and Sqle in Null, R172H and R270H cells following vehicle treatment (Off) or 8 hrs of p53 restoration (On). Average expression (n=4 cell lines/genotype) relative to Null cells (Off) shown  $\pm$ SEM (microarray data). **E.** Representative Taqman data (n=2 independent runs) for indicated genes in R270H cells after Srebf2 knockdown (3D cultures). SD of triplicate mean/cell line shown. NTC, non-targeting control; Pool = all four shRNAs. (see Figure 6F). **F.** Quantification of low- and high-grade tumor frequencies in R270H mice treated with Stn for 6 days. A minimum of 3 animals/cohort were analysed, ns: non-significant, Fischer's Exact Test.

Supplemental Table S1. Genes similarly regulated by p53 in Null, R172H and R270H cells

|          | Gene     | Target gene evidence |              | Gene      | Target gene evidence |              |
|----------|----------|----------------------|--------------|-----------|----------------------|--------------|
|          |          | ChIP*                | Functional** |           | ChIP*                | Functional** |
| 2 hrs    | Slc19a2  | Yes                  | Yes          | Blcap     | Yes                  | No           |
|          | Bbc3     | Yes                  | Yes          | Mast4     | Yes                  | No           |
|          | Mdm2     | Yes                  | Yes          | Crip2     | Yes                  | No           |
|          | Cdkn1a   | Yes                  | Yes          | Syncrip   | Yes                  | No           |
|          | Tp53inp1 | Yes                  | Yes          | Eprs      | Yes                  | No           |
|          | Sesn2    | Yes                  | Yes          | Ccdc3     | Yes                  | No           |
|          | Ccng1    | Yes                  | Yes          | Ckap2     | Yes                  | No           |
|          | Znf365   | Yes                  | Yes          | Nfe2l2    | Yes                  | No           |
|          | Phlda3   | Yes                  | Yes          | Areg      | Yes                  | No           |
|          | Ddit4l   | No                   | Yes          | Rnf169    | Yes                  | No           |
|          | Gtse1    | No                   | Yes          | Hist1h2ab | Yes                  | No           |
|          | Birc5    | Yes                  | Yes          | Mmp14     | Yes                  | No           |
|          | Zmat3    | Yes                  | Yes          | Hist1h2ah | Yes                  | No           |
|          | Dgka     | Yes                  | Yes          | Hist1h2ae | Yes                  | No           |
|          | Ercc5    | Yes                  | Yes          | Slc30a1   | Yes                  | No           |
|          | 8 hrs    | Upp1                 | Yes          | Yes       | Slc4a11              | Yes          |
| Pml      |          | Yes                  | Yes          | Ephx1     | No                   | Yes          |
| Ddit4    |          | Yes                  | Yes          | Ivl       | No                   | Yes          |
| Ccnd1    |          | Yes                  | Yes          | Itgb4     | No                   | Yes          |
| Apaf1    |          | Yes                  | Yes          | Ei24      | No                   | Yes          |
| Bax      |          | Yes                  | Yes          | Hist1h2aa | No                   | No           |
| Mcm3     |          | Yes                  | No           | Aunip     | No                   | No           |
| Evpl     |          | Yes                  | No           | Clspn     | No                   | No           |
| Top2a    |          | Yes                  | No           | Kiaa0101  | No                   | No           |
| Sh3bgrl2 |          | Yes                  | No           | Mcm10     | No                   | No           |
| Klhl26   |          | Yes                  | No           | Hist1h2aj | No                   | No           |
| Esco2    |          | Yes                  | No           | Hist1h2am | No                   | No           |
| Nek3     |          | Yes                  | No           | Hist1h2ap | No                   | No           |
| Pbk      |          | Yes                  | No           | Gdpd5     | No                   | No           |
| Kif15    |          | Yes                  | No           | Ggta1     | No                   | No           |
| Irf2bp1  |          | Yes                  | No           | Aldh4a1   | No                   | No           |
| Pgpep1   | Yes      | No                   | Prr15l       | No        | No                   |              |
| Plau     | Yes      | No                   | St3gal3      | No        | No                   |              |
| St3gal2  | Yes      | No                   | Kank3        | No        | No                   |              |
| B3galnt2 | Yes      | No                   | Anxa8        | No        | No                   |              |
| Comm3    | Yes      | No                   | Bscl2        | No        | No                   |              |
| Cpped1   | Yes      | No                   | Tmem150a     | No        | No                   |              |
| Inf2     | Yes      | No                   | Glipr1       | No        | No                   |              |
| Dyrk3    | Yes      | No                   | Hes6         | No        | No                   |              |
| Trim11   | Yes      | No                   | Fam2l2b      | No        | No                   |              |
| Dcxr     | Yes      | No                   | Hya1         | No        | No                   |              |
| Chaf1b   | Yes      | No                   | Prkd2        | No        | No                   |              |
| Gsto1    | Yes      | No                   | Tmem19       | No        | No                   |              |
| Nrm      | Yes      | No                   |              |           |                      |              |

\* Genes identified as p53 targets based on ChIP data (<http://chip-atlas.org> and Fischer et al., 2017). \*\* Genes identified as p53 targets based on functional studies (GSEA; Okamoto and Beach 1994; Lehar et al. 1996; Utrera et al. 1998; Biegging et al. 2014; Lo et al. 2001; Quintens et al. 2015).

**Supplemental Table S2. Distribution of direct p53 targets across different p53 restoration response groups.**

|                           |                          | R172H        |                    | R270H        |                    |
|---------------------------|--------------------------|--------------|--------------------|--------------|--------------------|
|                           |                          | No. of genes | Direct target (%)* | No. of genes | Direct target (%)* |
| <b>Commonly regulated</b> | <b>2 hrs</b>             | 11           | 82                 | 11           | 82                 |
|                           | <b>8 hrs</b>             | 76           | 64                 | 76           | 64                 |
|                           | <b>WT-like</b>           | 87           | 71                 | 43           | 70                 |
| <b>Dominant negative</b>  | <b>Decreased ability</b> | 143          | 55                 | 155          | 55                 |
|                           | <b>Complete failure</b>  | 72           | 43                 | 27           | 41                 |

\*Genes identified as direct p53 targets based on ChIP data (Fischer et al., 2017 and <http://chip-atlas.org>).

**Supplemental Table S3. Classification of *TP53* mutations in lung adenocarcinoma cases (TCGA, Nature 2014)**

| TCGA ID         | <i>TP53</i> Mutation | Mutation class |
|-----------------|----------------------|----------------|
| TCGA-50-6595-01 | R175H, S183*         | conformational |
| TCGA-91-6840-01 | Y220C                | conformational |
| TCGA-78-7536-01 | F270C                | conformational |
| TCGA-97-7553-01 | R282W                | conformational |
| TCGA-44-6777-01 | G245V                | conformational |
| TCGA-97-7554-01 | R249W                | conformational |
| TCGA-44-6775-01 | H168L                | conformational |
| TCGA-05-4430-01 | R249M                | conformational |
| TCGA-64-1679-01 | G245V                | conformational |
| TCGA-69-7760-01 | F270V                | conformational |
| TCGA-05-5423-01 | R249M, I195M         | conformational |
| TCGA-44-6774-01 | G245C                | conformational |
| TCGA-49-4514-01 | R175H                | conformational |
| TCGA-75-6214-01 | V157F                | conformational |
| TCGA-44-2662-01 | R280T                | contact        |
| TCGA-05-4432-01 | D281E, R342*         | contact        |
| TCGA-78-7149-01 | R248L                | contact        |
| TCGA-05-4410-01 | D281V                | contact        |
| TCGA-38-6178-01 | R283P                | contact        |
| TCGA-55-1596-01 | D281Y                | contact        |
| TCGA-05-4420-01 | R280I                | contact        |
| TCGA-55-7724-01 | R273H                | contact        |
| TCGA-64-5775-01 | R280G                | contact        |
| TCGA-78-7540-01 | R273C                | contact        |
| TCGA-95-7039-01 | R273L                | contact        |
| TCGA-49-4505-01 | C277F                | contact        |
| TCGA-05-4405-01 | R175H, C277F         | both           |

*TP53* mutations classified as conformational or contact based on effects on the protein structure or residues in direct contact with DNA according to Joerger et al, 2006; Joerger and Fersht, 2007; Cho et al, 1994.
